# Supplementary material
Source: publisher figshare collection journal article supplement (https://acs.figshare.com/ndownloader/files/7999912)
Supplement: Supplementary file 1 [file 7999912]

Supporting Information For DOI: 10.1021/cs.jpca.6b11916:  
Reactivity of Ketyl and Acetyl Radicals from Direct  
Solar Actinic Photolysis of Aqueous Pyruvic Acid  
Publication Date: March 31, 2017

---

*Alexis J. Eugene and Marcelo I. Guzman\**

Department of Chemistry, University of Kentucky, Lexington, Kentucky 40506, Unites States

\*Corresponding author's email: marcelo.guzman@uky.edu

---

The Journal of Physical Chemistry A

---

| <b>Content</b>                                                                                | <b>Page</b> |
|-----------------------------------------------------------------------------------------------|-------------|
| Additional Experimental Section                                                               | S2-S3       |
| <b>Figures</b>                                                                                |             |
| Figure S1. UHPLC-MS before and after distillation of pyruvic acid (PA)                        | S4          |
| Figure S2. UHPLC-MS of photoproducts                                                          | S4          |
| Figure S3. Time series of PA loss and photoproducts generation in D <sub>2</sub> O            | S5          |
| Figure S4. Tandem mass spectra of photoproducts                                               | S5          |
| Figure S5. <sup>13</sup> C NMR spectrum of photoproducts                                      | S6          |
| Figure S6. UHPLC-MS of hydrazones for <sup>13</sup> C labeled photoproducts                   | S6          |
| Figure S7. <sup>1</sup> H NMR spectrum of photoproducts before and after spiking lactic acid  | S7          |
| Figure S8. Dependence of the photolytic rate of PA on the photon absorption rate              | S7          |
| Figure S9. Initial rates of pyruvic acid loss and products formation vs initial [PA]          | S8          |
| <b>Tables</b>                                                                                 |             |
| Table S1. Comparison of infrared features for gas phase oxo-C <sub>7</sub> product to Acetoin | S9          |
| Table S2. Assignment of <sup>13</sup> C NMR spectrum of photolyzed                            | S10         |
| Table S3. Assignment of <sup>1</sup> H NMR spectrum of photolyzed                             | S11         |
| <b>References</b>                                                                             | S12         |

## Additional Experimental Section

**Fourier transformed infrared (FTIR) Spectroscopy.** Gas phase products were analyzed by performing the photolysis in a sealed 200 mL quartz reactor. Aliquots of the headspace above the reaction mixture were withdrawn through a septum using a syringe with a stainless steel needle and injected into a 2.4 m path length infrared gas cell with ZnSe windows (PIKE) and a capacity of 100 cm<sup>3</sup>. The cell was mounted in an iZ10 FTIR module connected to an infrared microscope (Thermo Scientific Nicolet iN10). Absorption spectra (and the background) were recorded at 1 cm<sup>-1</sup> resolution after allowing the cell to equilibrate for 30 min and purging the optics continuously with N<sub>2</sub>(g). In addition, photoproducts were spiked with acetoin vapor for qualitative analysis.

**UHPLC Analysis of Non-derivatized Samples.** Samples were analyzed with the same Accela 1250 LC-MS described in the main experimental section after diluting them 100 times in ultra-pure water. Separation used solvents A (methanol) and B (water) both with 0.1 mM formic acid. Initially a 5% solvent A was kept for 2 min, followed by a 3 min gradient reaching a 50% composition. The samples were spiked with 100 μM salicylic acid (Fluka, 99.6%) as an internal standard. Figure S2 shows good separation of 2,3-dimethyltartaric acid (*m/z* 177.04) and the oxo-C<sub>8</sub> product (*m/z* 219.05) confirming the observation made in Figure 1 of the main paper by IC-MS.

**Tandem Mass Spectrometry (MS/MS).** Figure S4 shows the fragmentation patterns for pyruvic acid (*m/z* 87), the oxo-C<sub>7</sub> product (*m/z* 175), DMTA (*m/z* 177) and the oxo-C<sub>8</sub> product (*m/z* 219). Figure S4A shows that pyruvic acid fragments into acetic acid (*m/z* 59) by decarbonylation. Figure S4B shows that the oxo-C<sub>7</sub> product easily produces a pyruvic acid like fragment with *m/z* 87 corresponding to C<sub>3</sub>H<sub>3</sub>O<sub>3</sub><sup>-</sup>, which is easily obtainable by breaking one of the ether bonds in

the proposed structure shown in Scheme 1 of the main paper. This fragmentation pattern is consistent with what was observed in the past,<sup>1</sup> where it was speculated that the lack of a second ESI(-) detectable fragment indicated there should only be one carboxyl group in the structure of the oxo-C<sub>7</sub> product. The IC-MS analysis presented in Figures 1 and 2 of the main text confirms this conjecture, and demonstrates that the dicarboxylic acid impurity parapyruvic acid (also with *m/z* 175) does not contribute to the MS/MS spectrum of the products. Figure S4C shows the MS/MS of DMTA (*m/z* 177) has fragments at *m/z* 131, 115, and 87, consistent with previous work.<sup>1</sup> In addition, this peak at *m/z* 177 loses a water giving *m/z* 159 and the fragment at *m/z* 115 can decarboxylate to form an ion at *m/z* 71. This secondary decarboxylation provides additional support indicating that the product with *m/z* 177 has two carboxyl groups as in the structure of DMTA. In Figure S4D, the oxo-C<sub>8</sub> product shows multiple ions arising from a labile species. The fragment at *m/z* 201 results from water loss from *m/z* 219. The fragments at *m/z* 175 (matching the oxo-C<sub>7</sub> product) and 157 result from decarboxylation of *m/z* 219 and 201, respectively. Confirmation of the presence of a remaining carboxyl group in *m/z* 175 is shown by its decarboxylation into *m/z* 131. The peak at *m/z* 201 easily breaks into *m/z* 117 by loss of C<sub>4</sub>H<sub>4</sub>O<sub>2</sub> (neutral mass 84 amu) or vice versa generating a weak peak at *m/z* 83 from the loss at 118 amu. The *m/z* 113 fragment can be produced by consecutive loss of a pyruvic acid monomer (88 amu) and water (18 amu) directly from the oxo-C<sub>8</sub> product. This pyruvic acid loss can also be observed at *m/z* 87. Finally, the oxo-C<sub>8</sub> product can fragment into the two halves *m/z* 147 and neutral 72 amu or *m/z* 71 and neutral 148 amu.

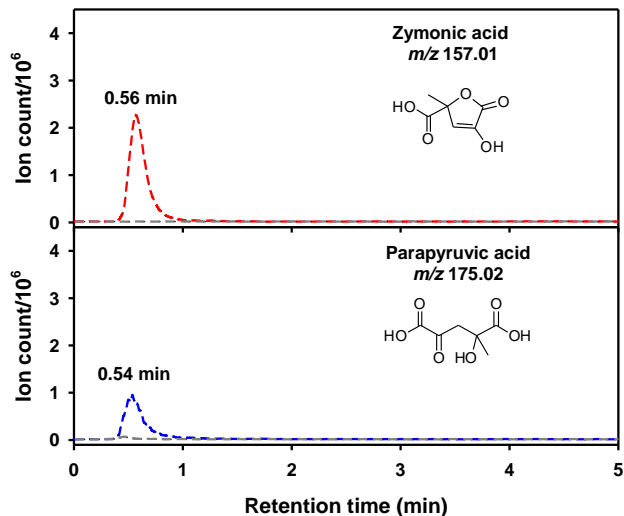

**Figure S1.** UHPLC-MS extracted ion chromatograms (EIC) for impurities in pyruvic acid reagent. Top panel: EIC at  $m/z$  157.01 for zymonic acid (red dashed line) before and (gray dashed line) after vacuum distillation. Bottom panel: EIC at  $m/z$  175.02 for parapyruvic acid (blue dashed line) before and (gray dashed line) after vacuum distillation.

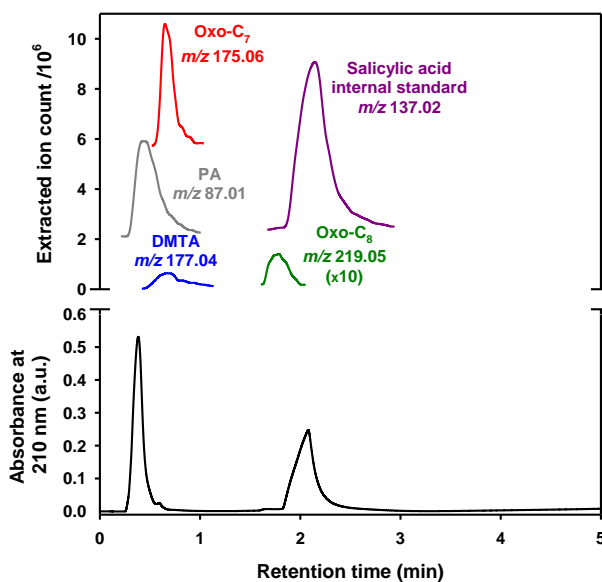

**Figure S2.** UHPLC (black line) UV chromatogram and ESI(-)/MS EIC for 100.9 mM pyruvic acid photolyzed to a 19.3% conversion. EICs at (gray line)  $m/z$  87.01 for pyruvic acid; (red line)  $m/z$  175.06 for oxo-C<sub>7</sub> product eluting at 0.65 min, (blue line)  $m/z$  177.04 for 2,3-dimethyltartaric acid (DMTA), (green line)  $m/z$  219.05 for oxo-C<sub>8</sub> product, and (purple)  $m/z$  137.02 for salicylic acid internal standard.

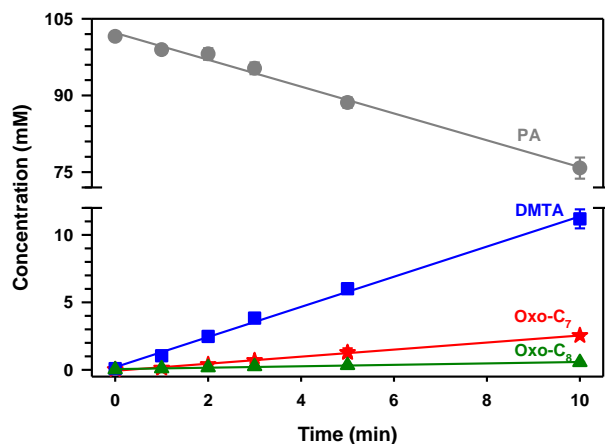

**Figure S3.** Time series of (gray circle) pyruvic acid loss, (red star) oxo-C<sub>7</sub> product, (blue square) DMTA, and (green triangle) oxo-C<sub>8</sub> product for the experiment in D<sub>2</sub>O at pD = 1.0 and 298 K. Initial slopes were used for the calculation of KIE reported in Table 1 of the main text.

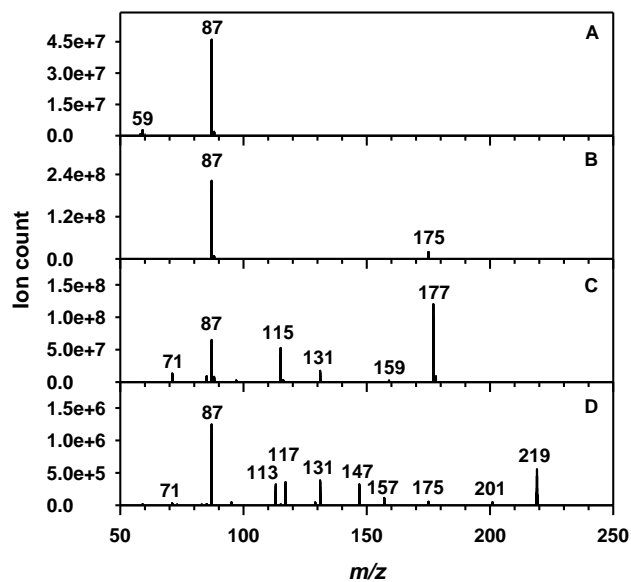

**Figure S4.** High resolution MS/MS fragmentation patterns for (A) pyruvic acid ( $m/z$  87); (B) oxo-C<sub>7</sub> ( $m/z$  175); and (C) DMTA ( $m/z$  177) in a solution of 100 mM pyruvic acid after photolysis to 20 % conversion.

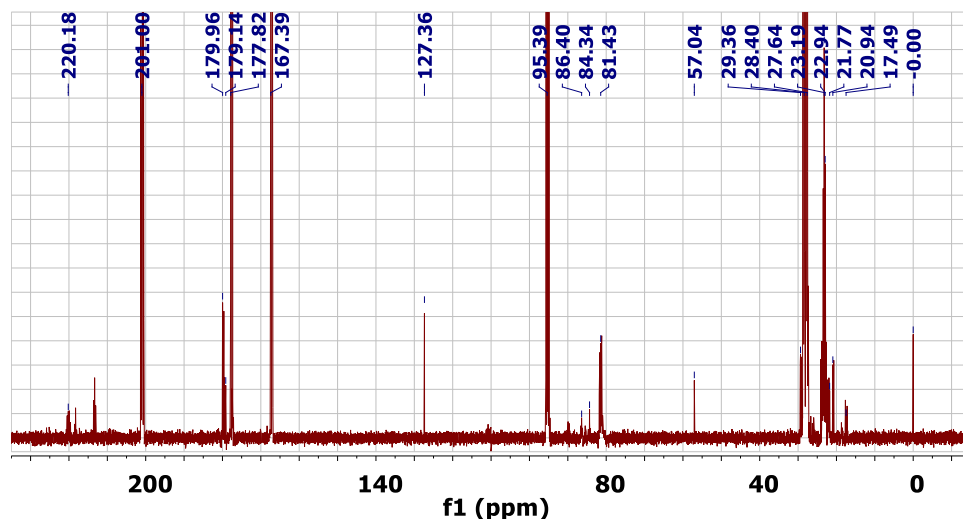

**Figure S5.** 150 MHz  $^{13}\text{C}$  NMR spectrum of 97.9 mM  $^{13}\text{C}$  labeled PA at  $\text{pD} = 1.0$  for a 9 min photolysis corresponding to a 50.2% conversion.

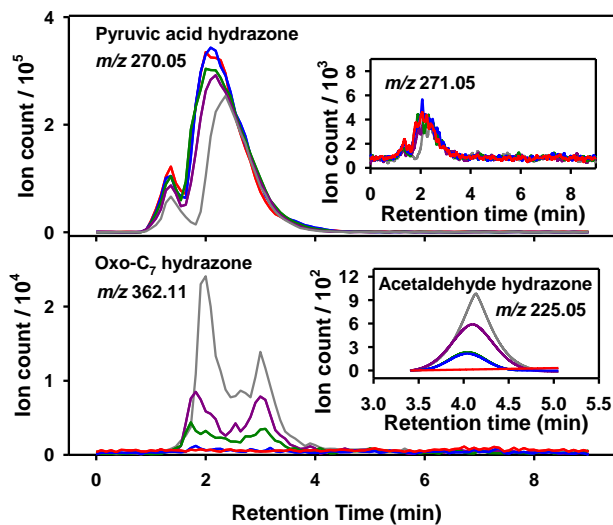

**Figure S6.** UHPLC-MS chromatograms from hydrazones of (top panel)  $^{13}\text{C}$  labeled PA ( $m/z$  270.05) and (bottom panel) oxo- $\text{C}_7$  product ( $m/z$  362.11) from an experiment with  $[^{13}\text{C PA}] = 115.2$  mM photolyzed during (red) 0, (blue) 1, (green) 3, (purple) 5, and (gray) 10 min. Top panel inset: EIC for  $m/z$  271.05. Bottom panel inset: Trace production of  $^{13}\text{C}$  acetaldehyde ( $m/z$  225.05) after smoothing with a Gaussian function.

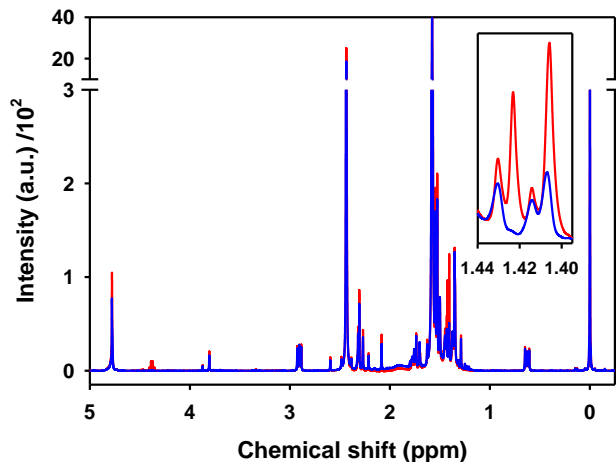

**Figure S7.** <sup>1</sup>H NMR spectrum of 99.9 mM PA photolyzed to 20.0 % conversion (blue) before and (red) after spike addition of lactic acid to a final concentration of 2.24 mM. The inset shows an expansion of the –CH<sub>3</sub> region for the doublet where lactic acid does not overlap well with the signal of the photoproducts.

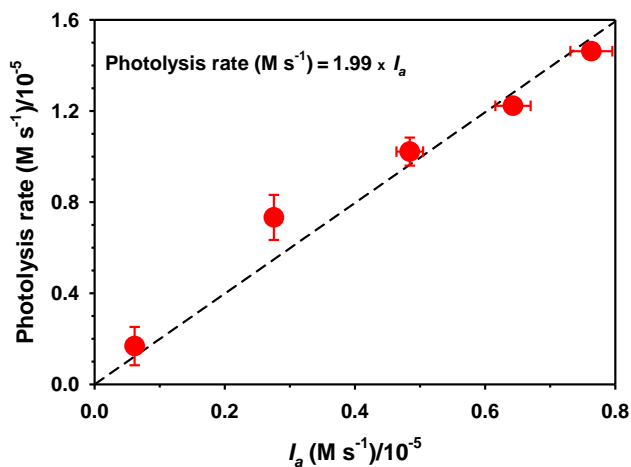

**Figure S8.** Dependence of the photolytic rate of pyruvic acid,  $k_{hv} \times [PA]_0$ , on the photon absorption rate,  $I_a$ , during direct photolysis of aqueous solutions ( $\lambda \geq 305$  nm) at pH = 1.0 and 298 K. Incident photon rate  $I_0 = 1.14 \times 10^{-5} \text{ M s}^{-1}$ .

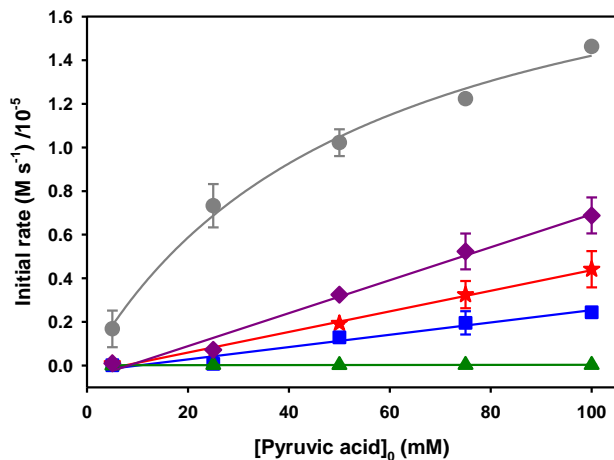

**Figure S9.** Initial rates of (gray circle) pyruvic acid loss and formation of (red star) the oxo-C<sub>7</sub> product, (blue square) 2,3-dimethyltartaric acid, (green triangle) the oxo-C<sub>8</sub> product, and (purple diamond) the sum for the three products at variable initial pyruvic acid concentration. Experimental conditions are the same reported in Figure S7.



**Table S1.** Infrared Assignment of Gas Phase Products for Photolyzed ( $\lambda \geq 305$  nm) 50 mM Pyruvic Acid in Water, Predicted Oxo-C<sub>7</sub> Product, and Acetoin.<sup>2</sup>

|         | Wavenumber (cm <sup>-1</sup> ) |                            | Strength | Assignment                     |
|---------|--------------------------------|----------------------------|----------|--------------------------------|
|         | Photolyzed                     | Oxo-C <sub>7</sub> Product |          |                                |
| 1033    | 1055-870                       | -                          | s        | C-O-C symmetric stretch        |
| 1056    | 1125-1000                      | 1124                       | s        | C-O stretch, secondary alcohol |
| 1085    | 1300-1100, 1120                | -                          | s        | C-O-C, asymmetric stretch      |
| 1316    | 1320-1210                      | -                          | m        | C-O stretch, carboxylic acid   |
| 1265    | 1300-1100                      | 1266                       | m        | carbonyl bend                  |
| Indist. | 1375                           | 1372                       | s        | methyl bend                    |
| Indist. | 1715                           | 1736                       | s        | C=O stretch, ketone            |
| Indist. | 1800-1740                      | -                          | s        | C=O stretch, carboxylic acid   |
| Indist. | 2872                           | 2872                       | s        | methyl C-H symmetric stretch   |
| 2967    | 2962                           | 2987                       | s        | methyl C-H asymmetric stretch  |
| -       | 3550-3500                      | -                          | m        | carboxylic acid OH stretch     |
| -       | 3650-3590                      | 3530                       | m        | O-H stretch                    |

**Table S2.** Assignment of the 150 MHz  $^{13}\text{C}$  NMR spectrum of 97.88 mM fully labeled  $^{13}\text{C}$  PA at pD = 1.0 photolyzed for 9 min for a 50.2% conversion.

| Chemical shift (ppm) | Assignment <sup>a</sup> (molecule, functionality)                                                                                 |
|----------------------|-----------------------------------------------------------------------------------------------------------------------------------|
| 220.18               | oxo-C <sub>7</sub> , CH <sub>3</sub> <u>C</u> (O)CH(CH <sub>3</sub> )O-                                                           |
| 201.00               | pyruvic acid, CH <sub>3</sub> <u>C</u> (O)COOH                                                                                    |
| 179.96               | oxo-C <sub>7</sub> , -C(OH)(CH <sub>3</sub> ) <u>C</u> OOH                                                                        |
| 179.14               | 2,3-dimethyltartaric acid, -C(OH)(CH <sub>3</sub> ) <u>C</u> OOH                                                                  |
| 177.82               | gem-diol of pyruvic acid, CH <sub>3</sub> C(OH) <u>2</u> COOH                                                                     |
| 167.39               | pyruvic acid, CH <sub>3</sub> C(O) <u>C</u> OOH                                                                                   |
| 127.36               | carbon dioxide                                                                                                                    |
| 95.39                | gem-diol of pyruvic acid, CH <sub>3</sub> <u>C</u> (OH) <sub>2</sub> COOH                                                         |
| 86.40                | oxo-C <sub>7</sub> , CH <sub>3</sub> C(O) <u>C</u> H(CH <sub>3</sub> )O-                                                          |
| 84.34                | 2,3-dimethyltartaric acid, - <u>C</u> (OH)(CH <sub>3</sub> )COOH                                                                  |
| 81.43                | oxo-C <sub>7</sub> , - <u>C</u> (OH)(CH <sub>3</sub> )COOH                                                                        |
| 57.04                | DSS, (CH <sub>3</sub> ) <sub>3</sub> -Si-CH <sub>2</sub> -CH <sub>2</sub> - <u>C</u> H <sub>2</sub> -SO <sub>3</sub> <sup>-</sup> |
| 29.36                | oxo-C <sub>7</sub> , <u>C</u> H <sub>3</sub> C(O)CH(CH <sub>3</sub> )O-                                                           |
| 28.40                | pyruvic acid, <u>C</u> H <sub>3</sub> C(O)COOH                                                                                    |
| 27.64                | gem-diol of pyruvic acid, <u>C</u> H <sub>3</sub> C(OH) <sub>2</sub> COOH                                                         |
| 23.19                | oxo-C <sub>7</sub> , CH <sub>3</sub> C(O)CH( <u>C</u> H <sub>3</sub> )O-                                                          |
| 22.94                | oxo-C <sub>7</sub> , -C(OH)( <u>C</u> H <sub>3</sub> )COOH                                                                        |
| 21.77                | 2,3-dimethyltartaric acid, -C(OH)( <u>C</u> H <sub>3</sub> )COOH                                                                  |
| 20.94                | DSS, (CH <sub>3</sub> ) <sub>3</sub> -Si-CH <sub>2</sub> - <u>C</u> H <sub>2</sub> -CH <sub>2</sub> -SO <sub>3</sub> <sup>-</sup> |
| 17.49                | DSS, (CH <sub>3</sub> ) <sub>3</sub> -Si- <u>C</u> H <sub>2</sub> -CH <sub>2</sub> -CH <sub>2</sub> -SO <sub>3</sub> <sup>-</sup> |
| 0.000                | DSS, ( <u>C</u> H <sub>3</sub> ) <sub>3</sub> -Si-CH <sub>2</sub> -CH <sub>2</sub> -CH <sub>2</sub> -SO <sub>3</sub> <sup>-</sup> |

**Table S3.** Assignment of the 600 MHz  $^1\text{H}$  NMR spectrum of 322 mM photolyzed pyruvic acid for a 20.3 % Conversion.

| Chemical shift (ppm) | Multiplicity | Assignment <sup>a</sup> (molecule, functionality, diastereomer <sup>b</sup> )                                 |
|----------------------|--------------|---------------------------------------------------------------------------------------------------------------|
| 4.420                | q            | oxo-C <sub>7</sub> , O-CH-C(O)CH <sub>3</sub> , <i>A</i> and <i>B</i>                                         |
| 2.463                | s            | pyruvic acid, CH <sub>3</sub> C=O                                                                             |
| 2.910                | t            | DSS, -CH <sub>2</sub> -SO <sub>3</sub> <sup>-</sup>                                                           |
| 2.322                | s            | oxo-C <sub>7</sub> , O-CH-C(O)CH <sub>3</sub> , <i>A</i>                                                      |
| 2.309                | s            | oxo-C <sub>7</sub> , O-CH-C(O)CH <sub>3</sub> , <i>B</i>                                                      |
| 2.271                | s            | C <sub>8</sub> , CH <sub>3</sub> C(O)C-, <i>A</i>                                                             |
| 2.217                | s            | C <sub>8</sub> , CH <sub>3</sub> C(O)C-, <i>B</i>                                                             |
| 2.086                | s            | acetic acid, CH <sub>3</sub> COOH                                                                             |
| 1.686                | m            | DSS, (CH <sub>3</sub> ) <sub>3</sub> -Si-CH <sub>2</sub> -CH <sub>2</sub> -                                   |
| 1.581                | s            | pyruvic acid gem-diol, CH <sub>3</sub> C(OH) <sub>2</sub>                                                     |
| 1.551                | s            | oxo-C <sub>7</sub> , O-CH(CH <sub>3</sub> )-C=O, <i>A</i>                                                     |
| 1.533                | s            | 2,3-dimethyltartaric acid, HO-C(CH <sub>3</sub> )-C(CH <sub>3</sub> )-OH, <i>A</i>                            |
| 1.527                | s            | oxo-C <sub>7</sub> , O-CH(CH <sub>3</sub> )-C=O, <i>B</i>                                                     |
| 1.499                | s            | 2,3-dimethyltartaric acid, HO-C(CH <sub>3</sub> )-C(CH <sub>3</sub> )-OH, <i>B</i>                            |
| 1.472                | s            | C <sub>8</sub> , HOOC-C(OH)-CH <sub>3</sub> , <i>A</i>                                                        |
| 1.451                | s, broad     | C <sub>8</sub> , HOOC-C(OH)-CH <sub>3</sub> , <i>B</i> and CH <sub>3</sub> -C(O)-C-CH <sub>3</sub> , <i>A</i> |
| 1.435                | s            | C <sub>8</sub> , CH <sub>3</sub> -C(O)-C-CH <sub>3</sub> , <i>B</i>                                           |
| 1.354                | s            | oxo-C <sub>7</sub> , HOOC-C(OH)-CH <sub>3</sub> , <i>A</i> and <i>B</i>                                       |
| 0.624                | t            | DSS, (CH <sub>3</sub> ) <sub>3</sub> -Si-CH <sub>2</sub> -CH <sub>2</sub> -                                   |
| 0.000                | s            | DSS, (CH <sub>3</sub> ) <sub>3</sub> -Si-                                                                     |

<sup>a</sup>Structures are given in Scheme 1 of the main paper. <sup>b</sup>Two diastereomers (labeled *A* and *B*) exist for each product.

## References

- (1) Guzman, M. I.; Colussi, A. J.; Hoffmann, M. R. Photoinduced oligomerization of aqueous pyruvic acid. *J. Phys. Chem. A* **2006**, *110*, 3619-3626.
- (2) Eugene, A. J.; Xia, S.-S.; Guzman, M. I. Negative production of acetoin in the photochemistry of aqueous pyruvic acid. *Proc. Nat. Acad. Sci. USA* **2013**, *110*, E4274-E4275.
